# Supplementary material
Source: Springer Nature journal article supplement (https://www.springermedizin.de/resource/supplementary/12958_2014_1247_MOESM7_ESM.pdf/9567140)

**a****FOXP3**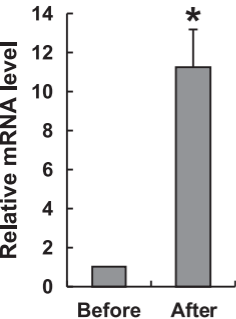**b****ROR $\gamma$ T**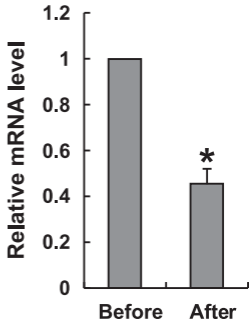

Supplement: MOESM7 [file 9567140]
